# Supplementary material
Source: publisher figshare collection journal article supplement (https://gsajournals.figshare.com/ndownloader/files/15381101)
Supplement: Supplementary file 1 [file 15381101]

**Table S1. Primers for RT-qPCR and Northern probe generation**

| Target Gene | Sequence | Efficiency |
| --- | --- | --- |
| *PDA1* | 5’-ATTTGCCCGTCGTGTTTTGCTGTG-3’ | 2.02 |
| *PDA1* | 5’-TATGCTGAATCTCGTCTCTAGTTCTGTAGG-3’ |
| *FIT2* | 5’-CTTTGACAAACGGTTCAGGTTC-3’ | 1.96 |
| *FIT2* | 5’-AGGAGGATGAGGAGGATGTAG-3’ |
| *FIT3* | 5’-ACACCTGGTCTCCAAGTAGTA-3’ | 1.96 |
| *FIT3* | 5’-AGAGGATGTAGCAGAGGAAGA-3’ |
| *SIT1* | 5’-ACTGTACTAGTCGTTGCAGTTC-3’ | 1.92 |
| *SIT1* | 5’-CCGAGGATTGTACCAACGATAA-3’ |
| *ARN1* | 5’-GGATGTAGGTATGTGGGCTTTC-3’ | 1.95 |
| *ARN1* | 5’-CGTGCCATTCAGGAGTCTTT-3’ |
| *PHO84* | 5’-CTACTGCCGTCGAATCTCTTG-3’ | 1.97 |
| *PHO84* | 5’-GAACCAGCAGTACCTAGCAAA-3’ |
| *PHO81* | 5’-ACTCAACAGGTTTATGCACTCT-3’ | 2.03 |
| *PHO81* | 5’-GGCGTCCATTTATTAAACCCATC-3’ |
| *PHO5* | 5’-CAGACTGTCAGTGAAGCTGAAT-3’ | 1.93 |
| *PHO5* | 5’-TGTCATCATTGGCATCGTAGTC-3’ |
| *SCR1* | 5’-CTGAAGTGTCCCGGCTATAAT-3’ | 1.83 |
| *SCR1* | 5’-CTAAGGACCCAGAACTACCTTG-3’ |
| *CUT 793/794* | 5’-GCGTAAATCACACAGGTGTTG-3’ |
| *CUT 793/794* | 5’-CAATTAATTCATGCCGTGTGAAG-3’ |
| *FET4* | 5’-GGATTTCCTGGTACGAGTGG-3’ |
| *FET4* | 5’-CGTTAGATAAACGGTCGTACC-3’ |
| *SCR1* | 5’-CAACTTAGCCAGGACATCCA-3’ |
| *SCR1* | 5’-AGAGAGACGGATTCCTCACG-3’ |

Primer sets with efficiencies listed were used for RT-qPCR and primers without efficiencies were used to amplify probes for Northern analysis.
